# Supplementary material for: Oroxylin A modulates mitochondrial function and apoptosis in human colon cancer cells by inducing mitochondrial translocation of wild-type p53
Source: PubMed Central journal article supplement (PMC4941367; doi:10.18632/oncotarget.7927), 2016-03-05
Supplement: oncotarget-07-17009-s001.pdf [file oncotarget-07-17009-s001.pdf]

# Oroxylin A modulates mitochondrial function and apoptosis in human colon cancer cells by inducing mitochondrial translocation of wild-type p53

## Supplementary Materials

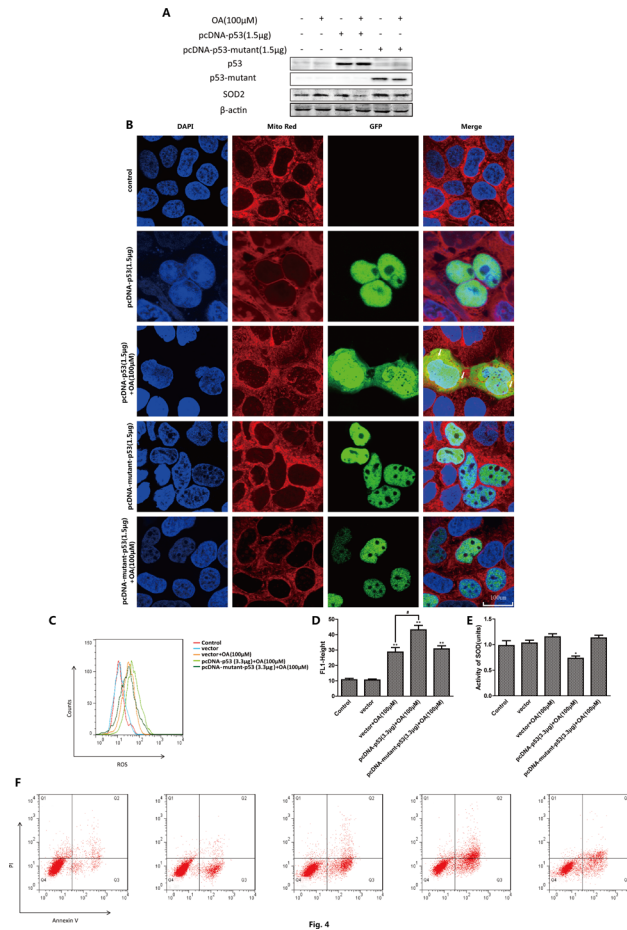

**Supplementary Figure S1:** (A) CaCo-2 cells were incubated with indicated concentration of DMSO, pcDNA-p53 (1.5 μg), oroxylin A(100 μM) + pcDNA-p53 (1.5 μg), pcDNA-mutant-p53 (1.5 μg), oroxylin A(100 μM) + pcDNA-mutant-p53 for 24 h and SOD2 expression were detected by Western blot. (B) Confocal images of cells show fluorescence of DAPI in blue, Mito in red, p53/mutant-p53 in green and are merged in Lane 4. (C) The ROS production was tested after transfection and oroxylin A (100 μM) as above (D) The ROS levels were quantified. (E) Activity of SOD2 in p53/mutant-p53 transfected CaCo-2 cells was evaluated as above. (F) Apoptosis cells in p53/mutant-p53 transfected CaCo-2 cells were quantitated as above. Bar, SD. \**P* < 0.05 or \*\**P* < 0.01 versus untreated control.
